# Supplementary material for: Supramolecular copolymers obtained from two-component gels: metal ion-mediated cross-linking, enhanced viscoelasticity and supramolecular yarns
Source: Royal Society of Chemistry journal article supplement (doi:10.1039/c4cc07813f), 2014-01-01
Supplement: c4cc07813f1.pdf [file c4cc07813f1.pdf]

# Supramolecular Copolymer from Two-component gels: Metal Ion-Mediated Cross-Linking, Enhanced Viscoelasticity and Supramolecular Yarn

Ling Wang,<sup>†,‡</sup> Yaqing Liu,<sup>‡</sup> Zhaocun Shen,<sup>‡</sup> Tianyu Wang,<sup>‡,\*</sup> and Minghua Liu<sup>‡,\*</sup>

<sup>†</sup>Department of Chemistry, School of Science, Tianjin University, Tianjin 300072, P. R. China.

<sup>‡</sup>Beijing National Laboratory for Molecular Science CAS, Key Laboratory of Colloid Interface and Chemical Thermodynamics, Institute of Chemistry, Chinese Academy of Science, Beijing 100190, P. R. China.

## 1: Experimental Section

**Materials:** 2, 2'-bipyridine-dicarboxylic acids were purchased from Sigma-Aldrich and used as received. Bolaamphiphilic L-histidine (**BolaHis**) was synthesized according to the method described in the literature. CuCl<sub>2</sub> and other metal salts were purchased from Acros Organics. All the other starting materials and solvents with analytical reagents grade were purchased from Beijing Chemicals. Milli-Q water (18.2 MΩ cm) was used in all cases.

**Instruments:** Scanning electron microscopy (SEM) was performed on a Hitachi S-4800 FE-SEM microscope and transmission electron microscopy (TEM) images were obtained on a JEM 2100F operating at accelerating voltages of 15 and 200 kV, respectively. JASCO UV-550 and JASCO J-810 CD spectrometers were used for the UV/Vis and CD spectral measurements, respectively. Fourier transform infrared (FT-IR) spectra were recorded on a JASCO FT/IR-660 plus spectrophotometer with a

wavenumber resolution of  $4\text{ cm}^{-1}$  at room temperature. X-ray diffraction (XRD) measurements was performed on a Rigaku D/Max-2500 X-ray diffract meter (Japan) with  $\text{Cu/K}\alpha$  radiation ( $\lambda = 1.5406\text{ \AA}$ ), which was operated at 45 kV, 100 mA. Rheological studies were achieved on a Discovery DHR-1 Rheometer (TA Instruments).

**Method:** The supramolecular polymers were cast onto single-crystal silica plates (Pt coated) and carbon-coated Cu grids (unstained), and the water was evaporated at ambient conditions first, then vacuum-dried for 12 h for SEM and TEM measurements. The KBr pellets made from the vacuum-dried supramolecular polymers were used for FT-IR spectra measurements. The 2mm cuvette was used for UV-Vis spectra and CD spectra measurements. The quartz-plate-sustained supramolecular polymers films were used for X-ray diffraction (XRD) measurements. The rheological measurements were carried out on the Discovery DHR-1 Rheometer (TA Instruments) using parallel plate geometry in a Peltier plate. The diameter of plate is 40 mm, and the plate gap was set as  $1000\mu\text{m}$ . The rheological properties of the samples were measured at  $25.00\text{ }^\circ\text{C}$ . Two types of experiments were performed: (1) Dynamic frequency spectrum; In the frequency sweep experiment, the variation of storage modulus ( $G'$ ) and loss modulus ( $G''$ ) was monitored as a function of applied angular frequency (from 1 to  $100\text{ rad s}^{-1}$ ) under a constant strain 0.1%. (2) Steady shear rheology; the range of shear rate has been changed from 0.01 to  $500\text{ s}^{-1}$ . All samples were performed with BolaHis at a concentration of 0.1 wt%.

## 2: Supplementary Table and Figures

Table S1. Gelation ability of two-component supramolecular polymers in water

| 2,2'bipy/Bola | 1:1 | 2:1 | 3:1 | 4:1 |
|---------------|-----|-----|-----|-----|
| B3D           | S   | S   | S   | S   |
| B4D           | G   | OG  | OG  | OG  |
| B5D           | TG  | G   | G   | G   |
| B6D           | P   | P   | P   | P   |

Concentration of **BolaHis**=0.1 wt%. P=precipitate; TG=transparent gel; OG=opaque gel; G=translucent gel; S=solution

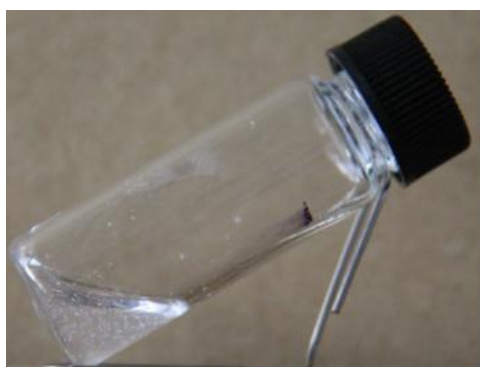

B3D/BolaHis systems

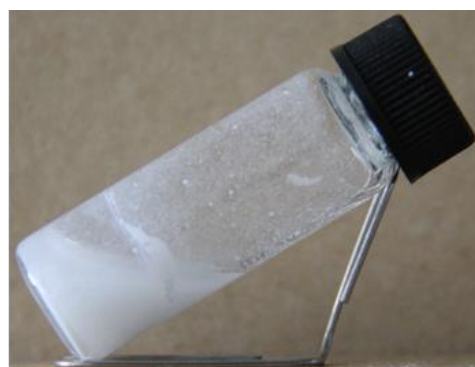

B6D/BolaHis systems

Figure S1: Photograph of **B3D/BolaHis** assemblies (left) and **B6D/BolaHis** assemblies (right).

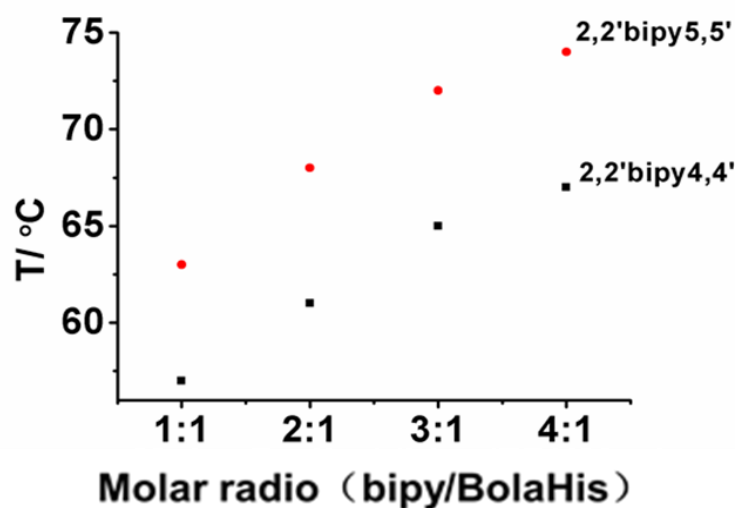

Figure S2: Sol-gel transition temperature ( $T_{gel}$ , °C) of hydrogels formed by **BolaHis** and 2, 2'-bipyridine-4, 4'-dicarboxylic acid (**B4D**) and 2, 2'-bipyridine-5, 5'-dicarboxylic acid (**B5D**)

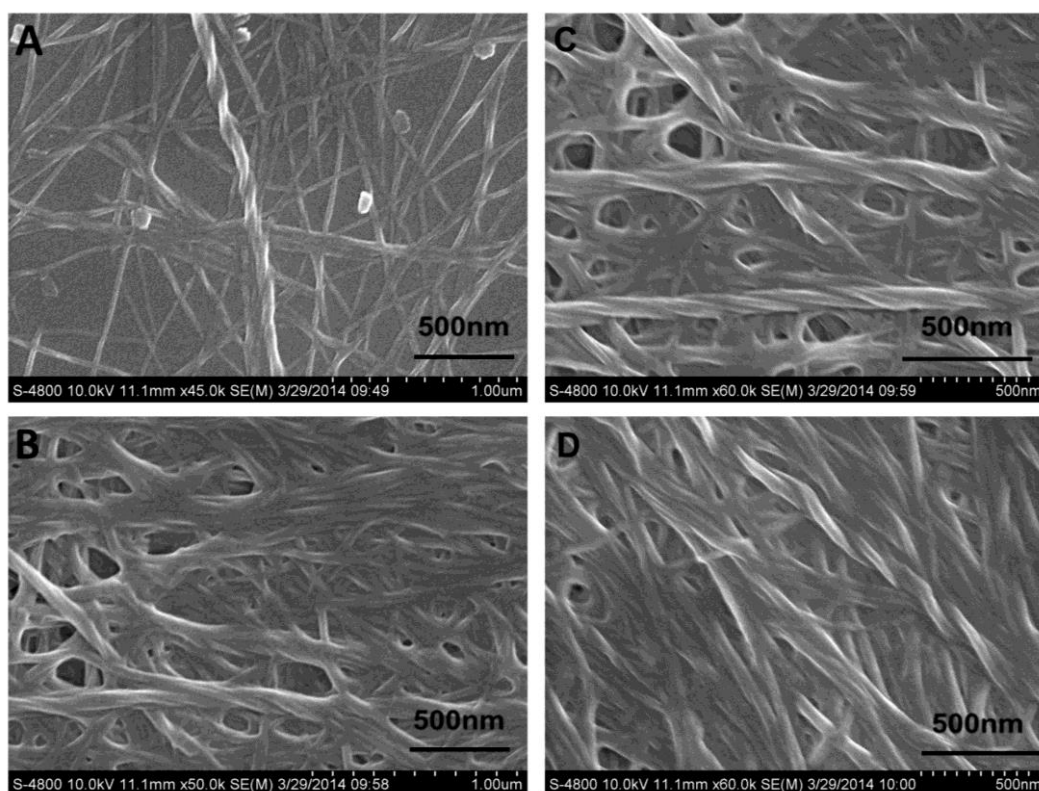

Figure S3: SEM images of two-component hydrogels formed by **B5D/BolaHis** (A, B); **B4D/BolaHis** (C, D).

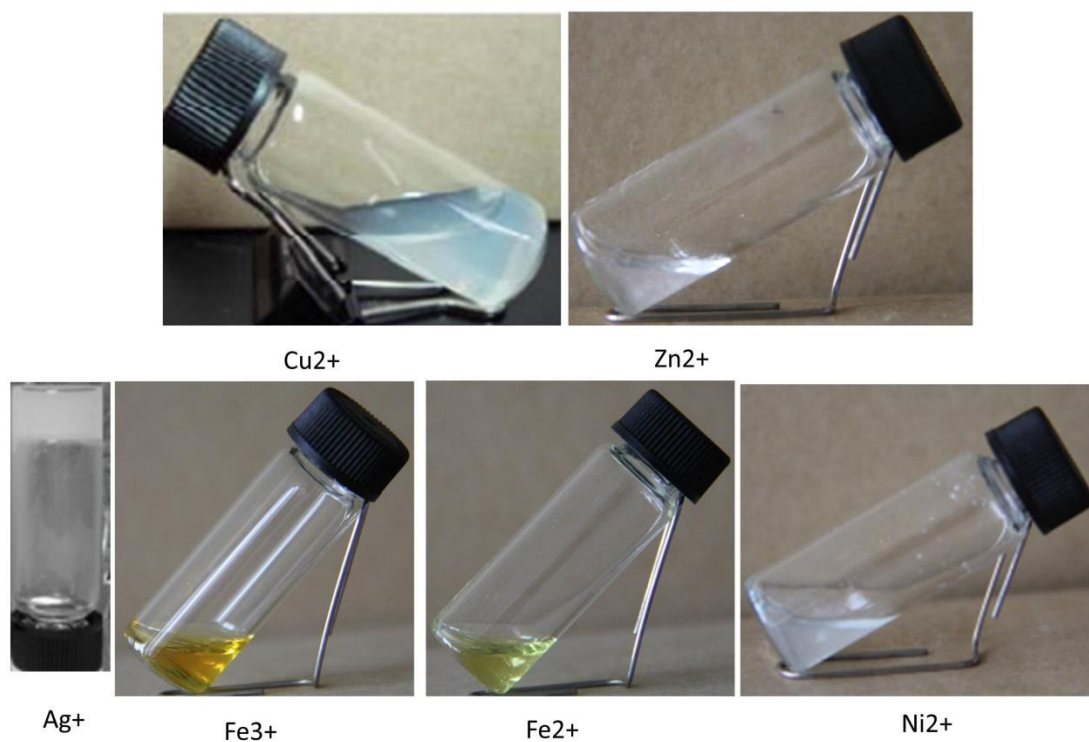

Figure S4: Photograph of **B5D/BolaHis** interacted with different metal ions.

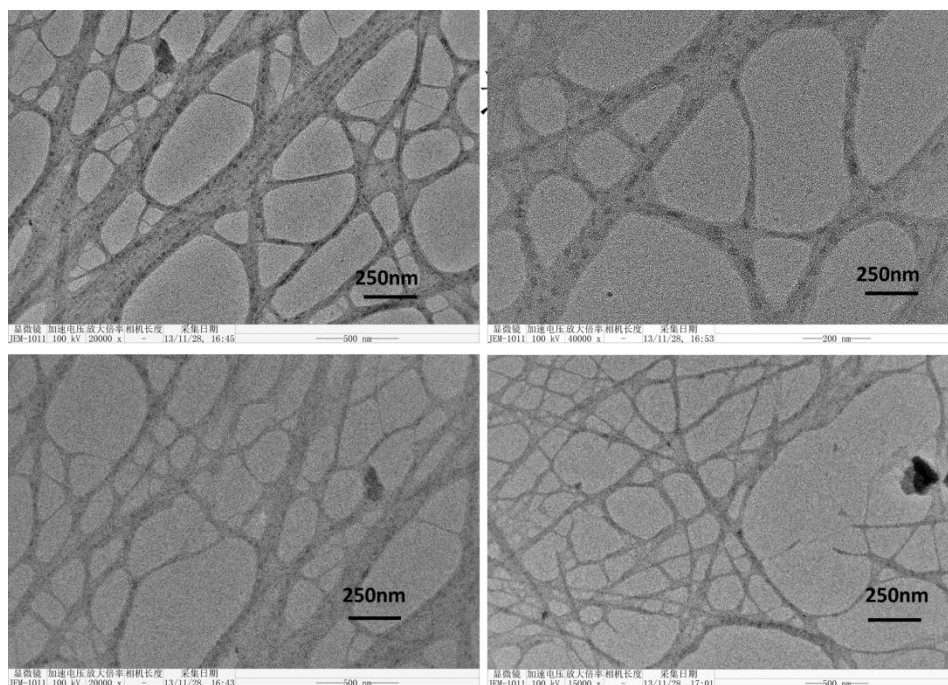

Figure S5: TEM images of  $\text{CuCl}_2/\text{B5D}/\text{BolaHis}=0.5/1/1$  supramolecular polymer.

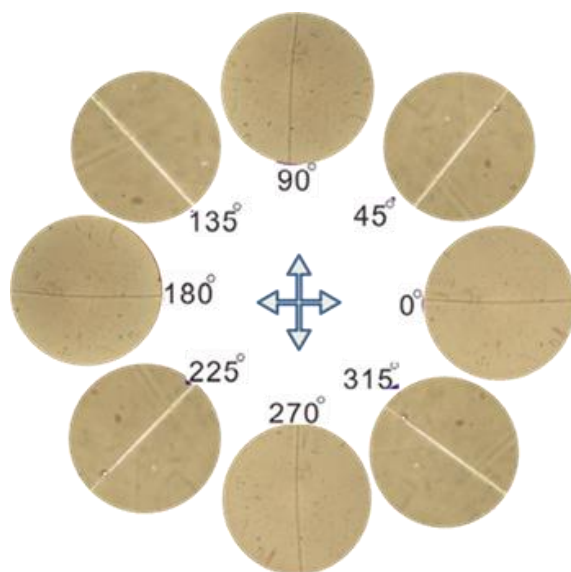

Figure S6: Cross-polarized microscope images of macroscopic supramolecular yarns.

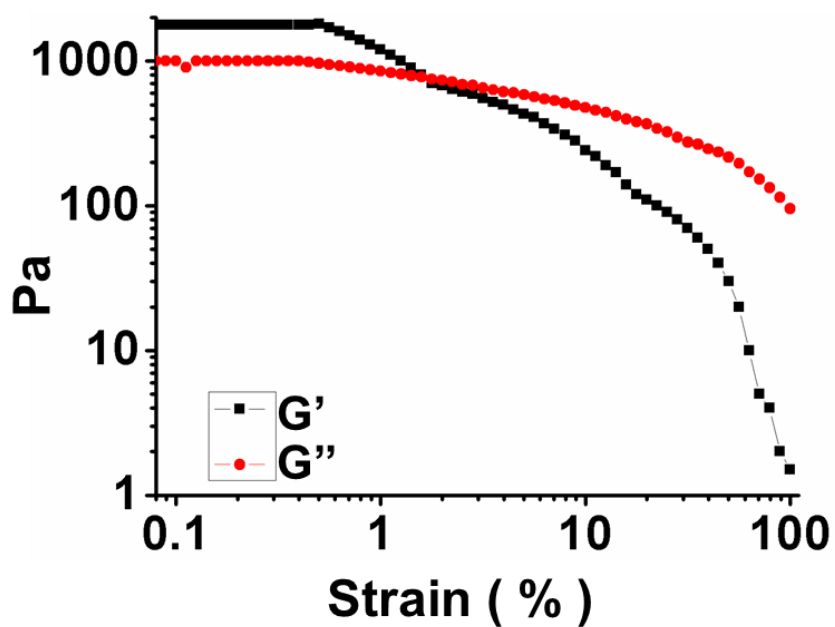

Figure S7. The Storage modulus  $G'$  and loss modulus  $G''$  values of the **B5D/BolaHis** systems on rheological experiments of strain sweep

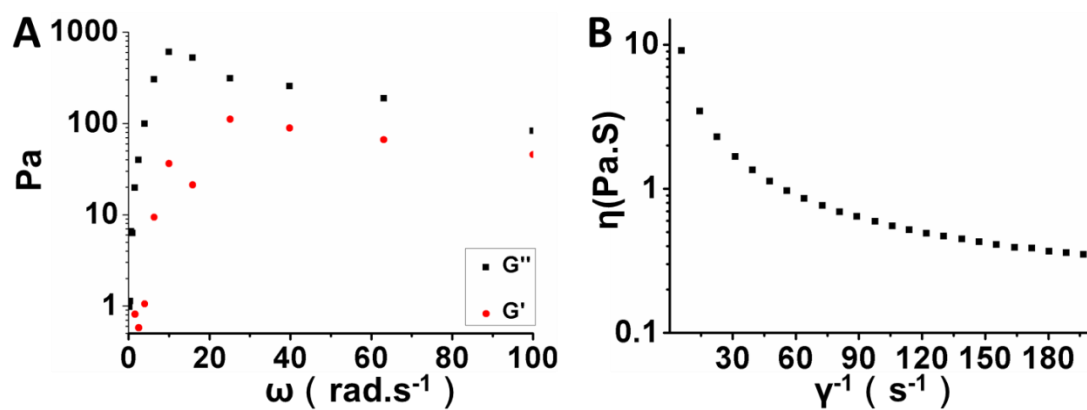

Figure S8: Rheological measurements on the aqueous solution of  $\text{ZnCl}_2/\text{B5D}/\text{BolaHis}=0.5/1/1$ . (A) Storage modulus  $G'$  and loss modulus  $G''$  versus frequency  $\omega$  (from 1 to  $100 \text{ rad s}^{-1}$ ) (B) Shear rate dependence of viscosity.

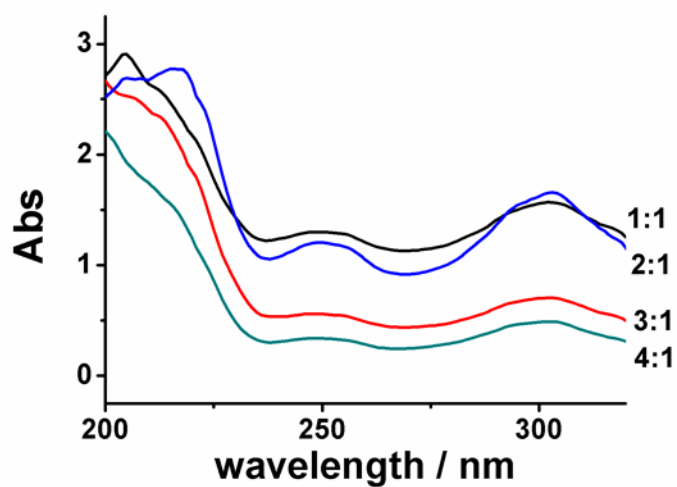

Figure S9: UV/Vis spectra of  $\text{CuCl}_2/\text{B5D}/\text{BolaHis}$  systems with different ratios.



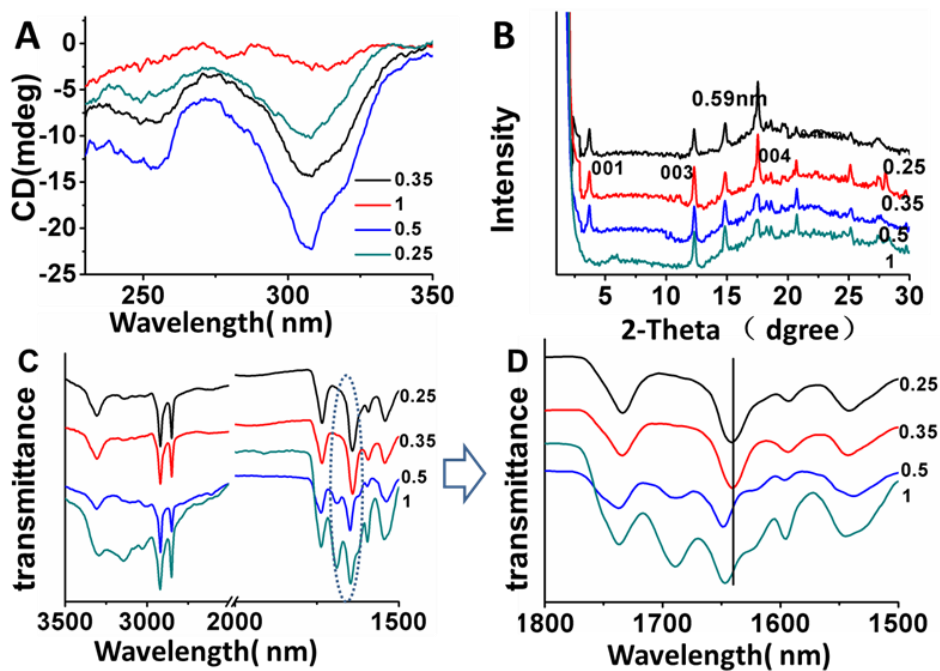

Figure S10: CD spectra (A), XRD pattern (B) and FT-IR spectra (C, D) of  $\text{CuCl}_2/\text{B5D}/\text{BolaHis}$  assemblies with different molar ratios. The molar ratios of **B5D/BolaHis** were kept as 1/1, and the quantity of  $\text{CuCl}_2$  was changed from  $\text{CuCl}_2/\text{B5D}/\text{BolaHis}=0.25/1/1$  to  $\text{CuCl}_2/\text{B5D}/\text{BolaHis}=1/1/1$ .

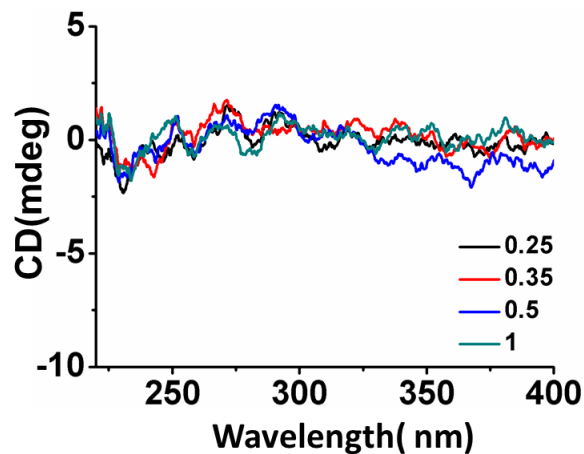

Figure S11: CD spectra of  $\text{ZnCl}_2/\text{B5D}/\text{BolaHis}$  assemblies. The molar ratios of **B5D/BolaHis** were kept as 1/1, and the quantity of  $\text{ZnCl}_2$  was changed from  $\text{ZnCl}_2/\text{B5D}/\text{BolaHis}=0.25/1/1$  to  $\text{ZnCl}_2/\text{B5D}/\text{BolaHis}=1/1/1$ .



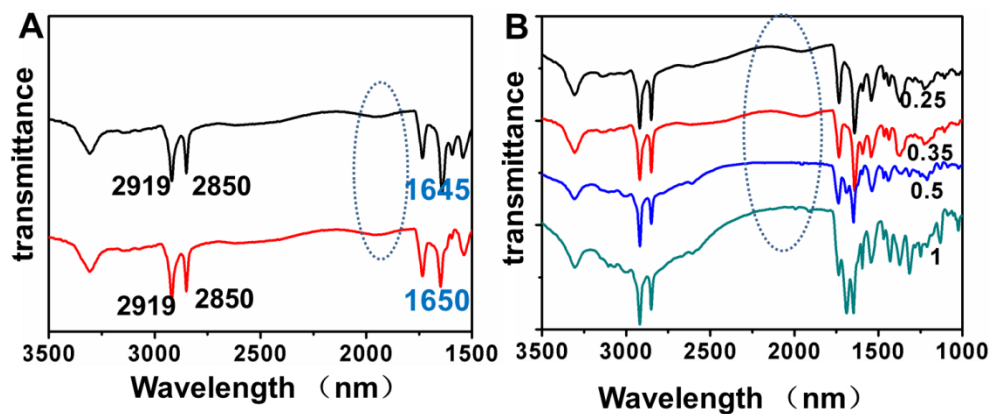

Figure S12: Enlarged FT-IR spectra for showing the broad band around 1940–1960  $\text{cm}^{-1}$  from Figure 3B (A) and Figure S9C (B).

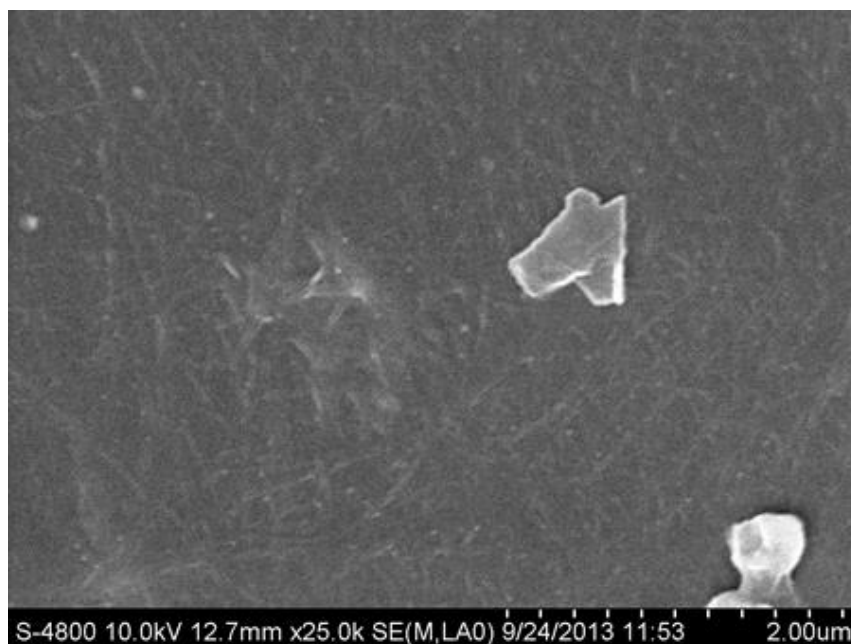

Figure S13: SEM images of  $\text{ZnCl}_2/\text{B5D}/\text{BolaHis}=0.5/1/1$  supramolecular polymer. Fiber structures were basically formed. However, there are some larger structures, which could be the complex formed by the B5D and  $\text{Zn}^{2+}$ .
